# Supplementary material
Source: PubMed Central journal article supplement (PMC2346504)
Supplement: pmed.0050093.sd005.pdf [file pmed.0050093.sd005.pdf]

## MMP1 ו MMP7 כסמנים בדם הפריפרי של חולים עם IDIOPATIC PULMANARY FIBROSIS

**רקע:** Idiopathic Pulmonary Fibrosis (IPF) היא מחלה צלקתית מתקדמת של הריאה הכרוכה בתחלואה ותמותה נכרת. מטרת מחקר זה היו לזהות חתימה של חלבונים בדם הפריפרי ולקבוע אם חלבונים השייכים לחתימה זו יכולים לשמש סמנים למחלה ולמהלכה.

**שיטות:** בדקנו את הריכוזים של 49 חלבונים בדם הפריפרי של 74 חולים עם IPF ו-53 אנשים ללא מחלה. זהינו חתימה הכוללת 5 חלבונים: TNFRF1A, MMP8, MMP1, MMP7 שהיתה מספקת להבדיל בין חולים ובין בריאים עם רגישות של 98.6%. רכוזים גבוהים של MMP1 ו MMP7 נמדדו גם בריאות של חולים עם IPF.

הריכוזים של MMP1 ו MMP7 לא היו גבוהים בחולים עם מחלות ריאות חסימתיות או סרקואידוזים אך כן הפרידו בין חולים עם IPF לחולים עם Hypersensitivity Pneumonitis, מחלה אשר עשויה לחקות IPF עם רגישות של 96.3 ויחודיות של 87.2. אישרנו את התוצאה שלנו בקבוצה בלתי תלויה של חולים עם IPF, עם רקע משפחתי, מחלת ריאות אינטרסטציאלית תת-קלינית וקבוצת בקורת. MMP1 ו MMP7 היו גבוהים משמעותית בחולי IPF בהשוואה לביקורת גם בקבוצה זו. בנוסף רמות MMP7 היו גבוהות יותר במחלת ריאות תת-קלינית והדגימו מתאם שלילי לתפקודי ריאה של החולים.

**מסקנות:** הניסויים שלנו מהווים עדות ראשונה להמצאות חתימת חלבונים בדם הפריפרי של חולים עם IPF. שני חלבונים מחתימה זו MMP1 ו MMP7 מבטאים ביתר ברקמת הריאה ומבדילים IPF ממחלות ריאה כרוניות אחרות. בנוסף, ריכוזים מוגברים של MMP7 עשויים לבטא מחלת ריאות אינטרסטציאלית תת-קלינית וכן לסמן את התקדמות המחלה.
